# Supplementary material for: Gypenoside XVII protects against myocardial ischemia and reperfusion injury by inhibiting ER stress–induced mitochondrial injury
Source: PubMed Central journal article supplement — J Ginseng Res. 2019 Nov 14;45(6):642–53. doi: 10.1016/j.jgr.2019.09.003 (PMC8569261; doi:10.1016/j.jgr.2019.09.003), 2019-11-14
Supplement: mmc1.pdf [file mmc1.pdf]

This document certifies that the manuscript

## **Gypenoside XVII Protects against Myocardial Ischemia and Reperfusion Injury by inhibiting the ER Stress-induced Mitochondrial Injury**

prepared by the authors

**Yingli Yu, Min Wang, Rongchang Chen, Xiao Sun, Guibo Sun, Xiaobo Sun**

was edited for proper English language, grammar, punctuation, spelling, and overall style by one or more of the highly qualified native English speaking editors at AJE.

This certificate was issued on **September 10, 2019** and may be verified on the [AJE website](#) using the verification code **1FDA-5A94-84A1-5F9A-8462**.

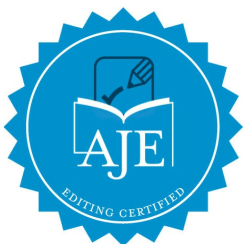

Neither the research content nor the authors' intentions were altered in any way during the editing process. Documents receiving this certification should be English-ready for publication; however, the author has the ability to accept or reject our suggestions and changes. To verify the final AJE edited version, please visit our verification page at [aje.com/certificate](#). If you have any questions or concerns about this edited document, please contact AJE at [support@aje.com](mailto:support@aje.com).
